# Supplementary material
Source: publisher figshare collection journal article supplement (https://tandf.figshare.com/ndownloader/files/22577054)
Supplement: Supplementary file 1 [file 22577054]

Supplementary material for Wu et al., “Metaheuristics for two-stage flow-shop assembly problem with a truncation learning function”, *Engineering Optimization*, 2020

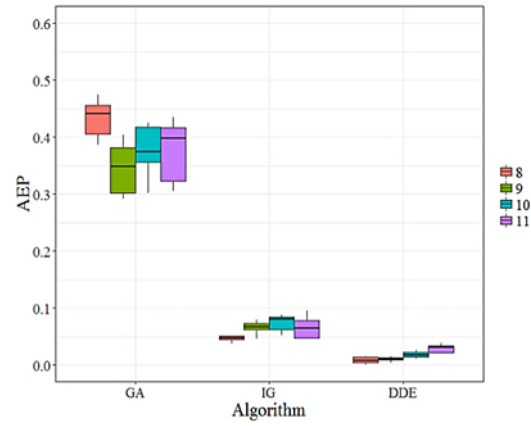

Figure S1. Average AEP obtained under variation in  $n$  for small- $n$  scheduling

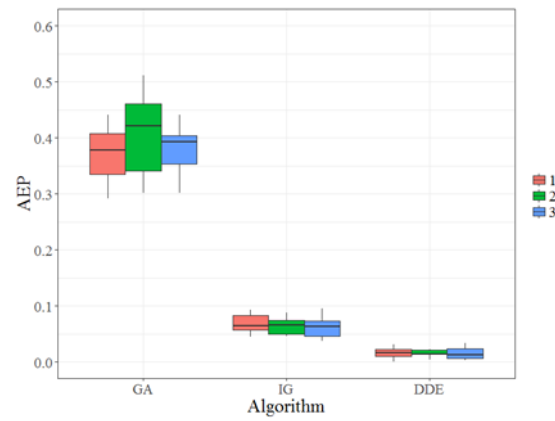

Figure S2. Average AEP obtained under variation in Type for small- $n$  scheduling

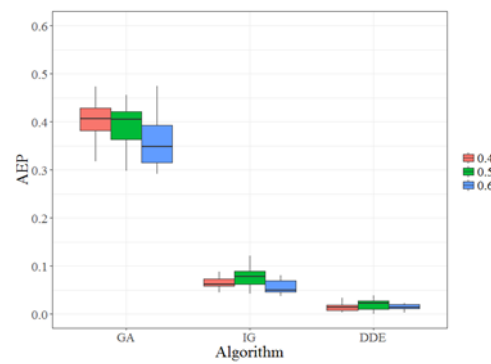

Figure S3. Average AEP obtained under variation in  $\tau$  for small- $n$  scheduling

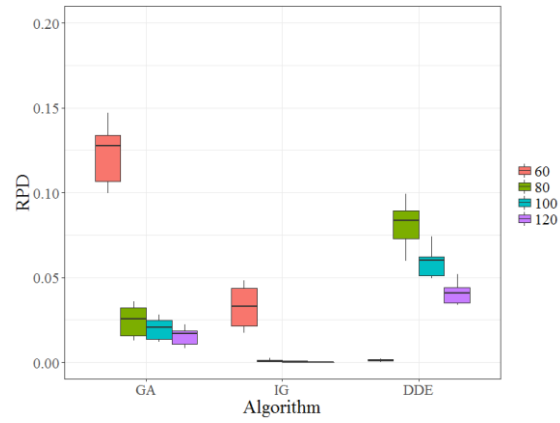

**Figure S4.** Average RPD obtained under variation in  $n$  for large- $n$  scheduling

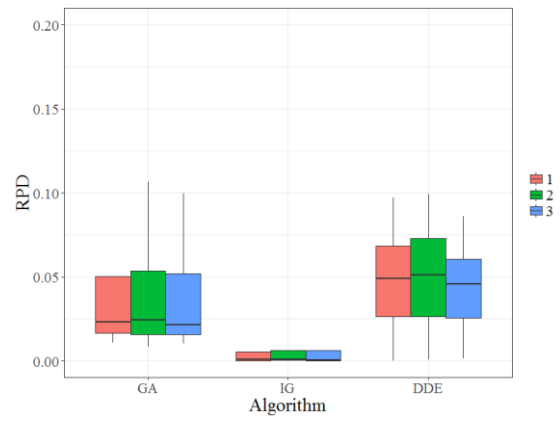

**Figure S5.** Average RPD obtained under variation in Type for large- $n$  scheduling

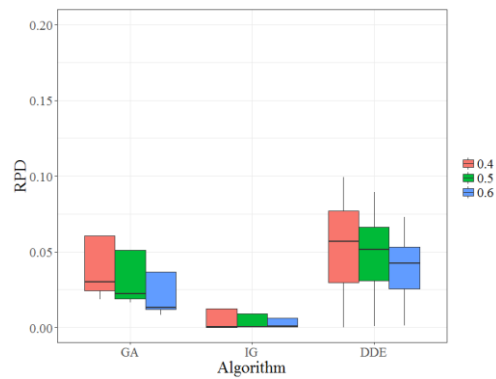

**Figure S6.** Average RPD obtained under variation in  $\tau$  for large- $n$  scheduling
